# Supplementary material
Source: Springer Nature journal article supplement (https://www.springermedizin.de/resource/supplementary/12936_2011_2066_MOESM6_ESM.pdf/9543464)
Supplement: MOESM6 [file 9543464]

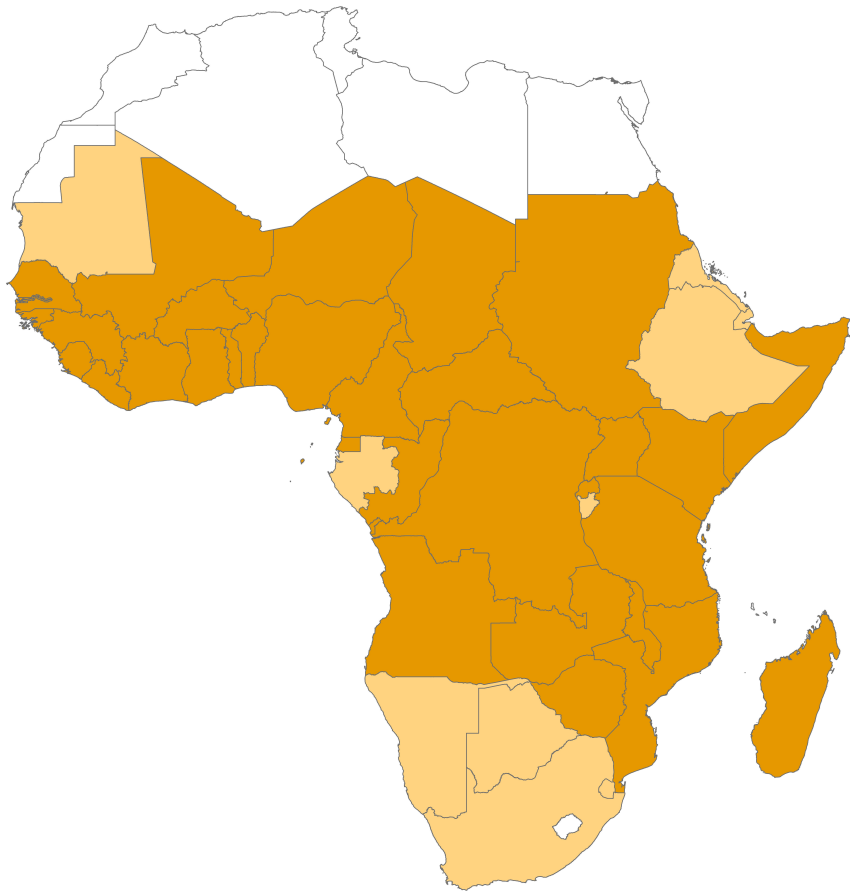

- Included in both lives saved due to ITNs and malaria prevention in pregnancy estimates
- Included in lives saved due to ITNs estimate
